# Supplementary material for: Nano-Interstice Driven Powerless Blood Plasma Extraction in a Membrane Filter Integrated Microfluidic Device
Source: MDPI journal article supplement (doi:10.3390/s21041366), 2021-02-15
Supplement: s1 [file s1]

## Supporting material

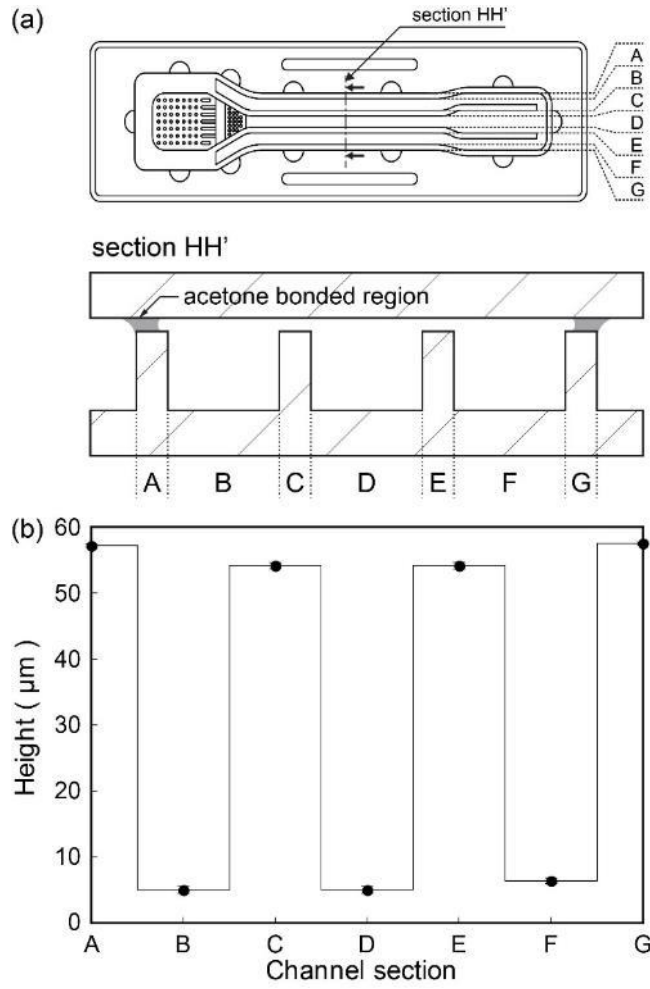

**Figure 1.** (a) Illustration of the plasma separation microfluidic device. The heights were measured at 7 points (A, B, C, D, E, F, and G) from section H-H'. (b) Measured height of the device after acetone bonding ( $n = 3$ , Error bars indicate standard deviation) (ST4080-OSP, K-MAC, Daejeon, Korea).
